# Supplementary material for: The Diagnostic Accuracy of a Fecal Immunochemical Test in Detecting Colorectal Cancer and Advanced Precancerous Colorectal Neoplasia in Patients with Iron Deficiency: A Protocol for Systematic Review and Meta-Analysis
Source: Hindawi journal article supplement (doi:10.1155/2023/5982580), 2023-12-08
Supplement: f1 [file 5982580.f1.pdf]

Supplementary table 1 – Keywords and MeSH used for different databases in the systematic search

|                                        |          | Master search                                                                                                                                                                                                               | MEDLINE                                                                                                                                                                                                                         | Web of science                                                                                                                                                                                                              | EMBASE                                                                                                                                                                                                                          |
|----------------------------------------|----------|-----------------------------------------------------------------------------------------------------------------------------------------------------------------------------------------------------------------------------|---------------------------------------------------------------------------------------------------------------------------------------------------------------------------------------------------------------------------------|-----------------------------------------------------------------------------------------------------------------------------------------------------------------------------------------------------------------------------|---------------------------------------------------------------------------------------------------------------------------------------------------------------------------------------------------------------------------------|
| Concept 1 – Iron deficiency            | Keywords | Iron or "iron deficien*" or IDA                                                                                                                                                                                             | (Iron or "iron deficien*" or IDA).mp.                                                                                                                                                                                           | Iron or "iron deficien*" or IDA                                                                                                                                                                                             | (Iron or "iron deficien*" or IDA).mp                                                                                                                                                                                            |
|                                        | MeSH     | exp Iron Deficiencies/                                                                                                                                                                                                      | exp Iron Deficiencies/                                                                                                                                                                                                          | N/A                                                                                                                                                                                                                         | exp Iron Deficiency/                                                                                                                                                                                                            |
| Concept 2 – Faecal immunochemical test | Keywords | "faecal immuno* test*" or "fecal immuno* test*" or FIT or FITs or qFIT or "faecal occult" or "fecal occult" or "stool occult" or FOB* or iFOB* or "immuno* fecal" or "immuno* faecal" or "immuno* stool" or "occult blood"  | ("f?ecal immuno* test*" or FIT or FITs or qFIT or "f?ecal occult" or "stool occult" or FOB* or iFOB* or "immuno* f?ecal" or "immuno* stool" or "occult blood").mp.                                                              | "f*ecal immuno* test*" or FIT or FITs or qFIT or "f*ecal occult" or "stool occult" or FOB* or iFOB* or "immuno* f*ecal" or "immuno* stool" or "occult blood").                                                              | ("f?ecal immuno* test*" or FIT or FITs or qFIT or "f?ecal occult" or "stool occult" or FOB* or iFOB* or "immuno* f?ecal" or "immuno* stool" or "occult blood").mp                                                               |
|                                        | MeSH     | exp Occult Blood/                                                                                                                                                                                                           | exp Occult Blood/                                                                                                                                                                                                               | N/A                                                                                                                                                                                                                         | exp occult blood test/ or exp occult blood/                                                                                                                                                                                     |
| Concept 3 – Colorectal cancer          | Keywords | ((Colo* or bowel or rect* or caec* or cec* or sigmoid* or intestin* or gastrointestin* or GI) and (adeno* or serrated or polyp* or cancer* or carcinoma* or neoplas* or malignan* or lesion* or tumour* or tumor*)) or CRC. | ((Colo* or bowel or rect* or caec* or cec* or sigmoid* or intestin* or gastrointestin* or GI) and (adeno* or serrated or polyp* or cancer* or carcinoma* or neoplas* or malignan* or lesion* or tumour* or tumor*)) or CRC).mp. | ((Colo* or bowel or rect* or caec* or cec* or sigmoid* or intestin* or gastrointestin* or GI) and (adeno* or serrated or polyp* or cancer* or carcinoma* or neoplas* or malignan* or lesion* or tumour* or tumor*)) or CRC. | ((Colo* or bowel or rect* or caec* or cec* or sigmoid* or intestin* or gastrointestin* or GI) and (adeno* or serrated or polyp* or cancer* or carcinoma* or neoplas* or malignan* or lesion* or tumour* or tumor*)) or CRC).mp. |
|                                        | MeSH     | exp Intestinal Polyps/ exp intestinal neoplasm/ exp neoplasm/                                                                                                                                                               | exp Intestinal Polyps/ exp intestinal neoplasm/ exp neoplasm/                                                                                                                                                                   | N/A                                                                                                                                                                                                                         | exp intestine polyp/ exp intestine tumor/ exp neoplasm/                                                                                                                                                                         |
